# Supplementary material
Source: Royal Society of Chemistry journal article supplement (doi:10.1039/d6nj00836d)
Supplement: d6nj00836d1.pdf [file d6nj00836d1.pdf]

## Supplementary information

# Structure-Based Discovery of Potent Small-Molecule Inhibitors Targeting the PD-1/PD-L1 Interaction

Zhong Lin-Yi<sup>a</sup>, Li Guang-Ping<sup>a</sup>, Wang Cheng-su<sup>b</sup>, Guo Hai-qiong<sup>a</sup>, Hu Yong<sup>a</sup>, Luo Ming-he<sup>a</sup>, Ouyang Qin<sup>b</sup>, Xu Ting<sup>a</sup>, Wang Tao<sup>a</sup>, Zhang Ning<sup>a\*</sup> and Wang Yuan-Qiang<sup>a\*</sup>

<sup>a</sup>School of Pharmacy and Bioengineering, Chongqing University of Technology, Chongqing, 400054, China.

\* Corresponding author E-mail:

Zhang Ning, [zhangning88@cqut.edu.cn](mailto:zhangning88@cqut.edu.cn); Yuanqiang Wang, [wangyqnn@cqut.edu.cn](mailto:wangyqnn@cqut.edu.cn)

## S1. Supplementary Methods

### Docking Parameter Details

Docking parameters were configured as follows:<sup>1,2</sup>

- (a) The number of starting conformations per ligand and the maximum conformations per fragment were set to 10 and 20, respectively;
- (b) The maximum number of rotatable bonds per molecule was set to 100;
- (c) Flags were enabled for pre-dock minimization, post-dock minimization, molecular fragmentation, and soft grid treatment;
- (d) The spin alignment method was activated with a search density of 9.0;
- (e) The number of spins per alignment was set to 12.

To obtain hit compounds via virtual screening:<sup>3</sup>

- (a) Ten starting conformations were generated for each in-house small molecule;
- (b) Each was docked into the defined interfacial region of the PD-1/PD-L1 complex using SYBYL, and the top 20 poses were retained;
- (c) Compounds were ranked by the best docking score;

(d) The top nine compounds were selected for experimental evaluation, among which two compounds showing measurable binding were advanced for further studies..

**Table S1. Binding affinities and selection outcomes of nine candidate compounds**

| No. | Compound ID | KD (M)                | Docking Score (kcal/mol) | SPR Result         | Functional Test      | Selection Outcome |
|-----|-------------|-----------------------|--------------------------|--------------------|----------------------|-------------------|
| 1   | 30594145    | NB                    | 6.5104                   | Not detected       | Not tested           | Excluded          |
| 2   | 45941420    | $1.93 \times 10^{-4}$ | 6.5462                   | Weak binding       | Not tested           | Excluded          |
| 3   | 53820389    | NB                    | 6.5918                   | Not detected       | Not tested           | Excluded          |
| 4   | 57944596    | $4.53 \times 10^{-5}$ | 6.5114                   | Weak binding       | Not tested           | Excluded          |
| 5   | 66236437    | $1.07 \times 10^{-4}$ | 6.8512                   | Weak binding       | Not tested           | Excluded          |
| 6   | 7844239     | $1.51 \times 10^{-6}$ | 7.2694                   | Measurable binding | Significant activity | <b>Selected</b>   |
| 7   | 11313672    | NB                    | 7.2051                   | Not detected       | Not tested           | Excluded          |
| 8   | 17115039    | NB                    | 7.6046                   | Not detected       | Not tested           | Excluded          |
| 9   | 23468559    | $8.9 \times 10^{-8}$  | 7.2080                   | Measurable binding | Significant activity | <b>Selected</b>   |

KD values were determined by surface plasmon resonance (SPR). NB indicates no detectable binding under the experimental conditions. Representative KD values obtained from SPR fitting are shown. Only compounds showing robust and reproducible binding signals were selected for subsequent functional evaluation.

**Fig.S1 Chemical structures of the nine candidate compounds identified from virtual screening**

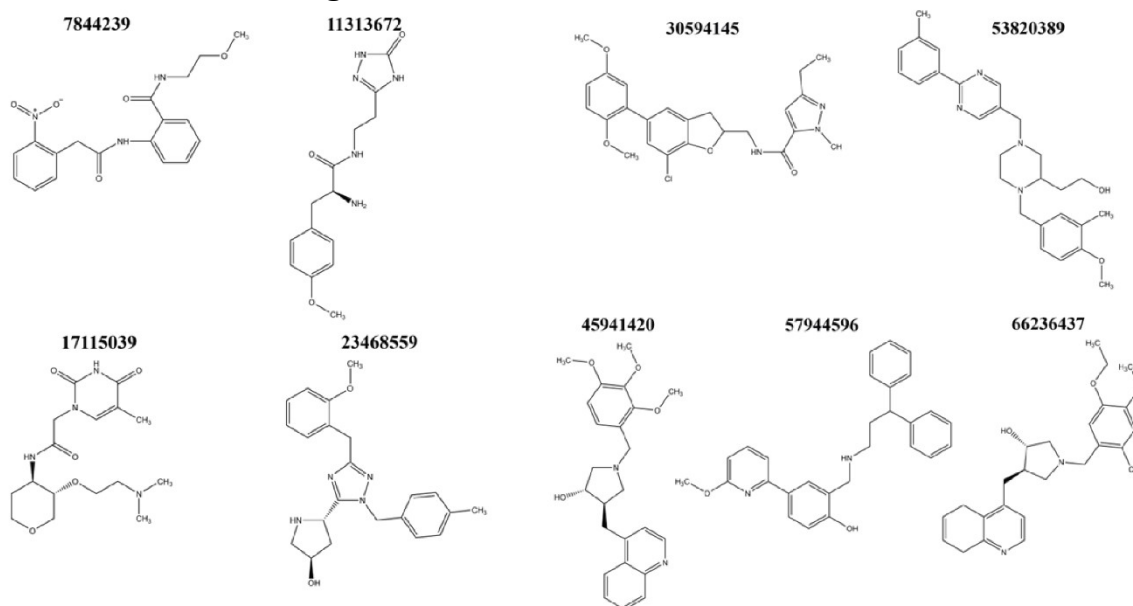

**Fig.S2 Two-dimensional interaction diagrams of small molecules with the PD-1/PD-L1 interface**

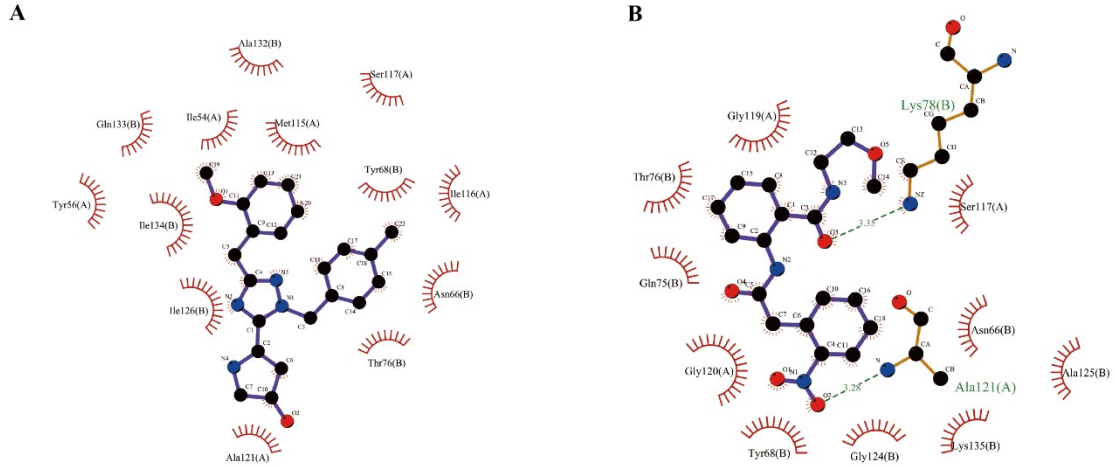

Two-dimensional interaction diagrams of (a) ID23468559 and (b) ID7844239 with the PD-1/PD-L1 complex generated using LigPlot. Hydrophobic contacts are represented by red arcs, and hydrogen bonds are shown as green dashed lines with corresponding distances.

### Fig.S3 SPR analysis of the interaction between PD-1 and PD-L1.

Kinetics: 'PD-L1', fit: '1: 1:1 Binding'

Sample: PD-L1 Temp: 25°C Curve: Fc=2-1

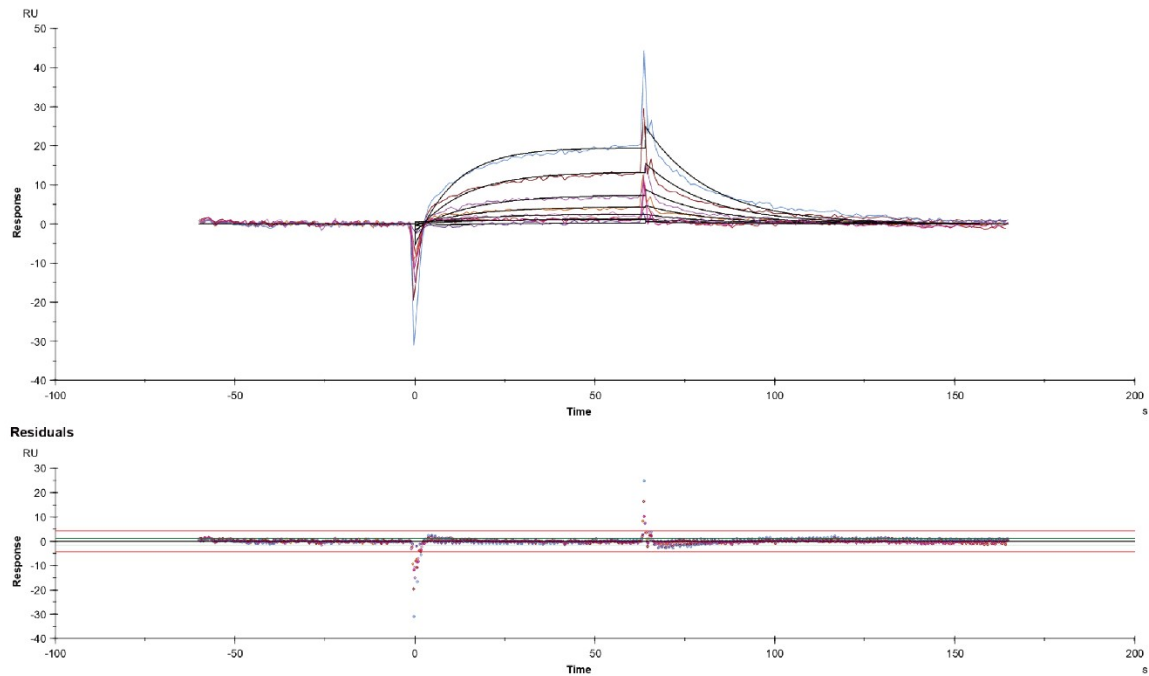

Fig.S3. A series of PD-L1 concentrations (9.375–600 nM) were injected over immobilized PD-1, and the binding kinetics were analyzed using a 1:1 binding model. The equilibrium dissociation constant ( $K_D$ ) was determined to be  $8.8 \times 10^{-7}$  M. The fitting  $\chi^2$  value was 2.61  $\text{RU}^2$

**Fig.S4. Representative SPR sensorgrams showing the binding of ID7844239 (A) and ID23468559 (B) to human PD-1**

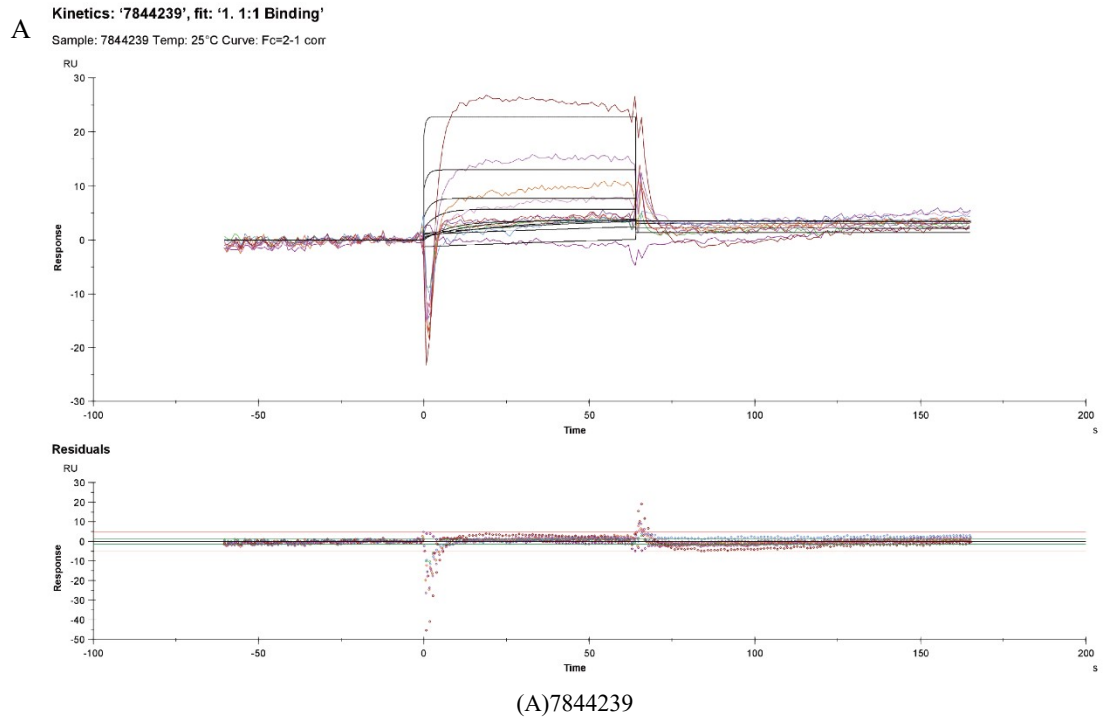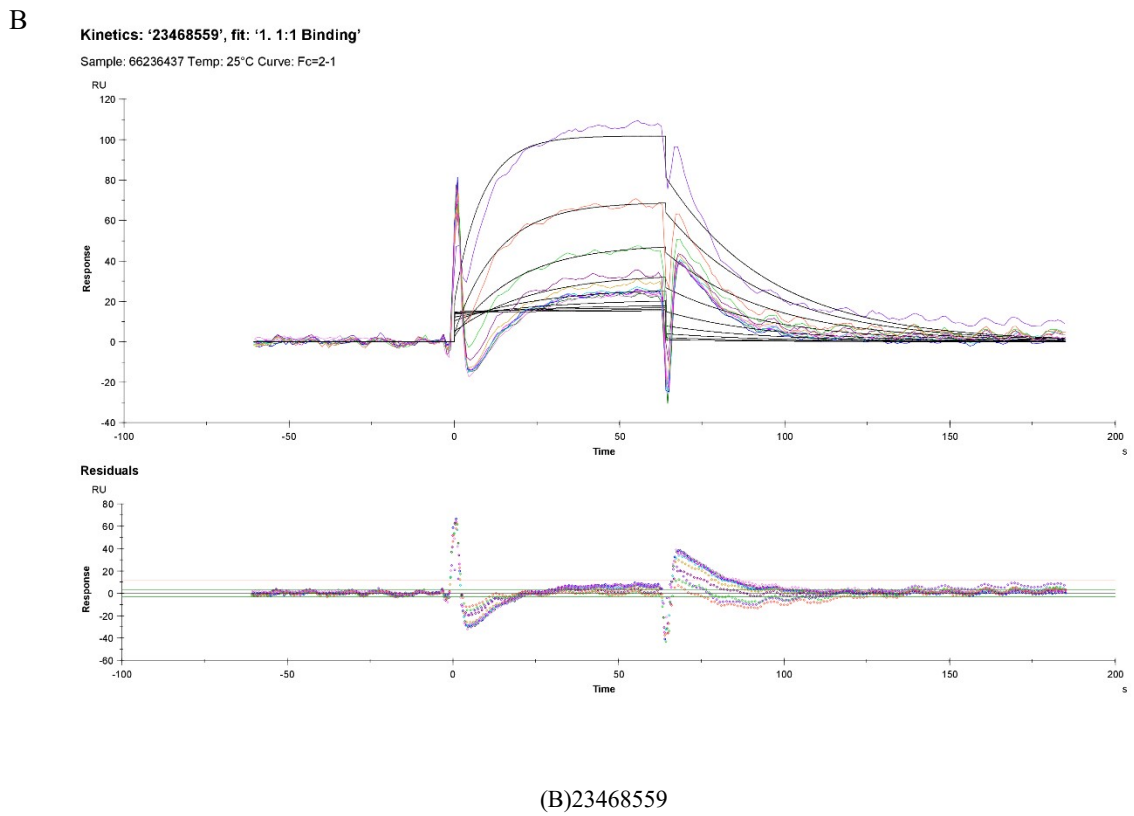

Fig.S4 Representative SPR sensorgrams showing the binding of ID7844239 (A) and ID23468559 (B) to human PD-1. The data were fitted using a 1:1 binding model. The reported KD values represent the mean of three independent experiments. The fitting  $\chi^2$  values were 7.17 RU<sup>2</sup> and 14.70 RU<sup>2</sup> for ID7844239 and ID23468559, respectively.

### Table.S2 SPR-based competitive binding assay

Table.s2 Summary of small-molecule inhibitors and their competitive inhibition with PD-1/PD-L1

| No. | Small Molecule ID | Competitive Inhibition | Figure   |
|-----|-------------------|------------------------|----------|
| 1   | 7844239           | Y                      | Fig. S5a |
| 2   | 23468559          | Y                      | Fig. S5b |

Note: "Y" indicates confirmed competitive inhibition between the small molecule and PD-1/PD-L1.

### Fig.S5 Competitive inhibition of small-molecule on PD-1/PD-L1

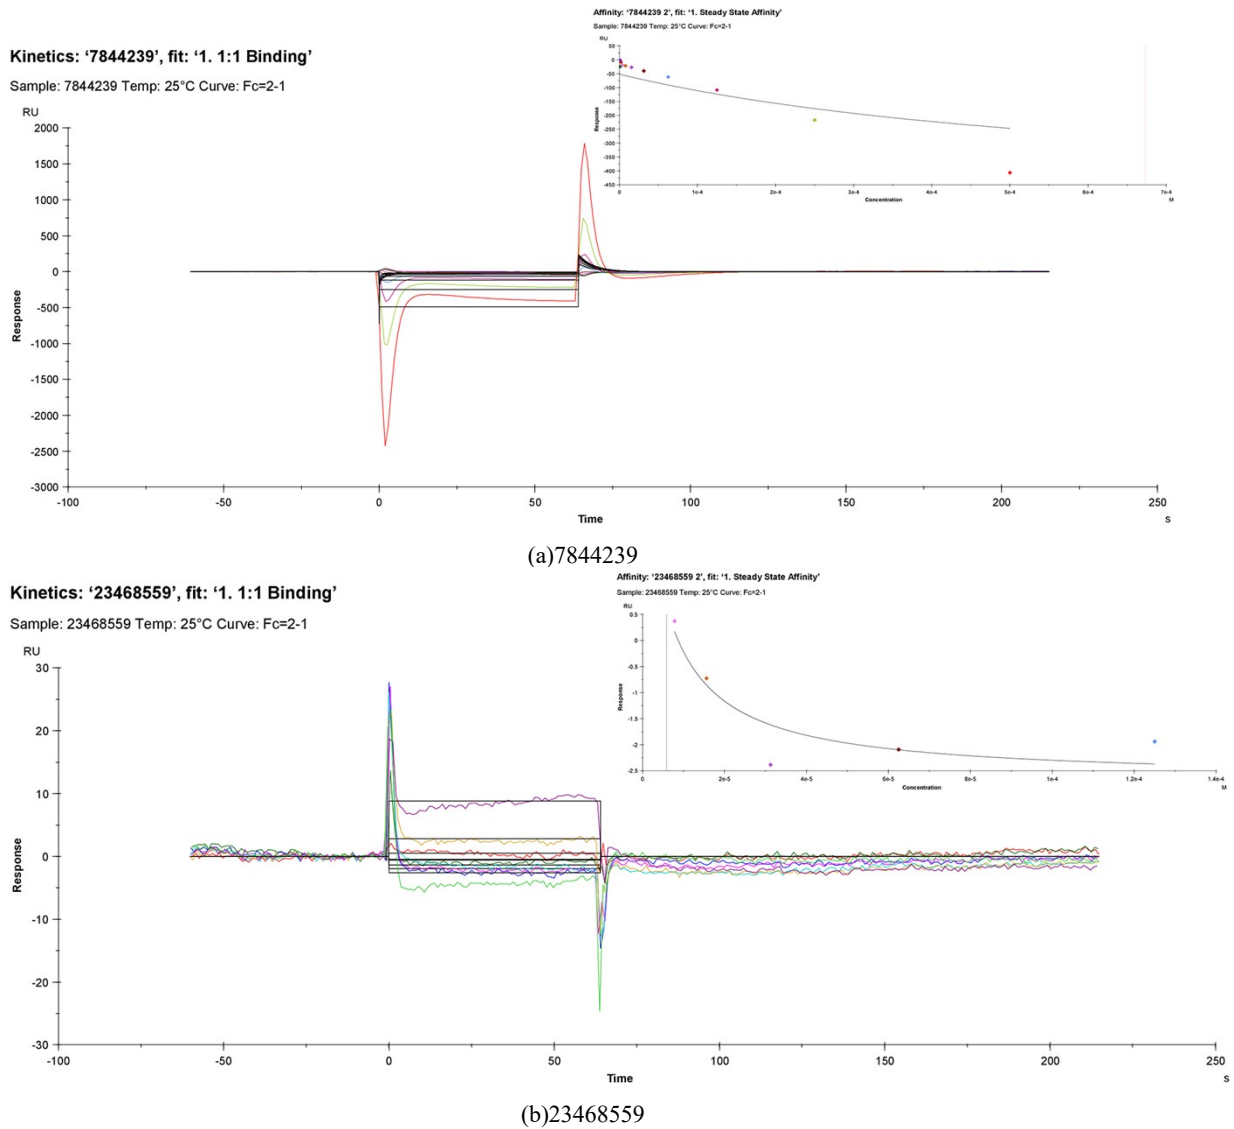

Fig.S5 Competitive inhibition of small-molecule on PD-1/PD-L1.(7844239/23468559)
